# Supplementary material for: The structure of a C. neoformans polysaccharide motif recognized by protective antibodies: A combined NMR and MD study
Source: PubMed Central journal article supplement (PMC10508755; doi:10.1101/2023.09.06.556507), 2023-09-06
Supplement: media-1.pdf [file media-1.pdf]

## Supporting Information for

The structure of a *C. neoformans* polysaccharide motif recognized by protective antibodies:  
A combined NMR and MD study

### Authors:

Audra A. Hargett<sup>a,1</sup>, Hugo F. Azurmendi<sup>a,1</sup>, Conor J. Crawford<sup>b,c,d</sup>, Maggie P. Wear<sup>b</sup>, Stefan Oscarson<sup>c</sup>, Arturo Casadevall<sup>b</sup>, and Darón I. Freedberg<sup>a</sup>

### Affiliations:

<sup>a</sup> Laboratory of Bacterial Polysaccharides, Office of Vaccines Research and Review, Center for Biologics Evaluation and Research, U.S. Food and Drug Administration, Silver Spring, MD, USA

<sup>b</sup> W. Harry Feinstone Department of Molecular Microbiology and Immunology, Johns Hopkins Bloomberg School of Public Health, Baltimore, MD, USA

<sup>c</sup> Centre for Synthesis and Chemical Biology, University College Dublin, Belfield, Dublin 4, Ireland

<sup>d</sup> Current address: Department of Biomolecular Systems, Max Planck Institute of Colloids and Interfaces, Potsdam, Germany

### This PDF file includes:

Figures S1 to S8

Tables S1 to S4

Supplemental movie legend SM1 to SM3

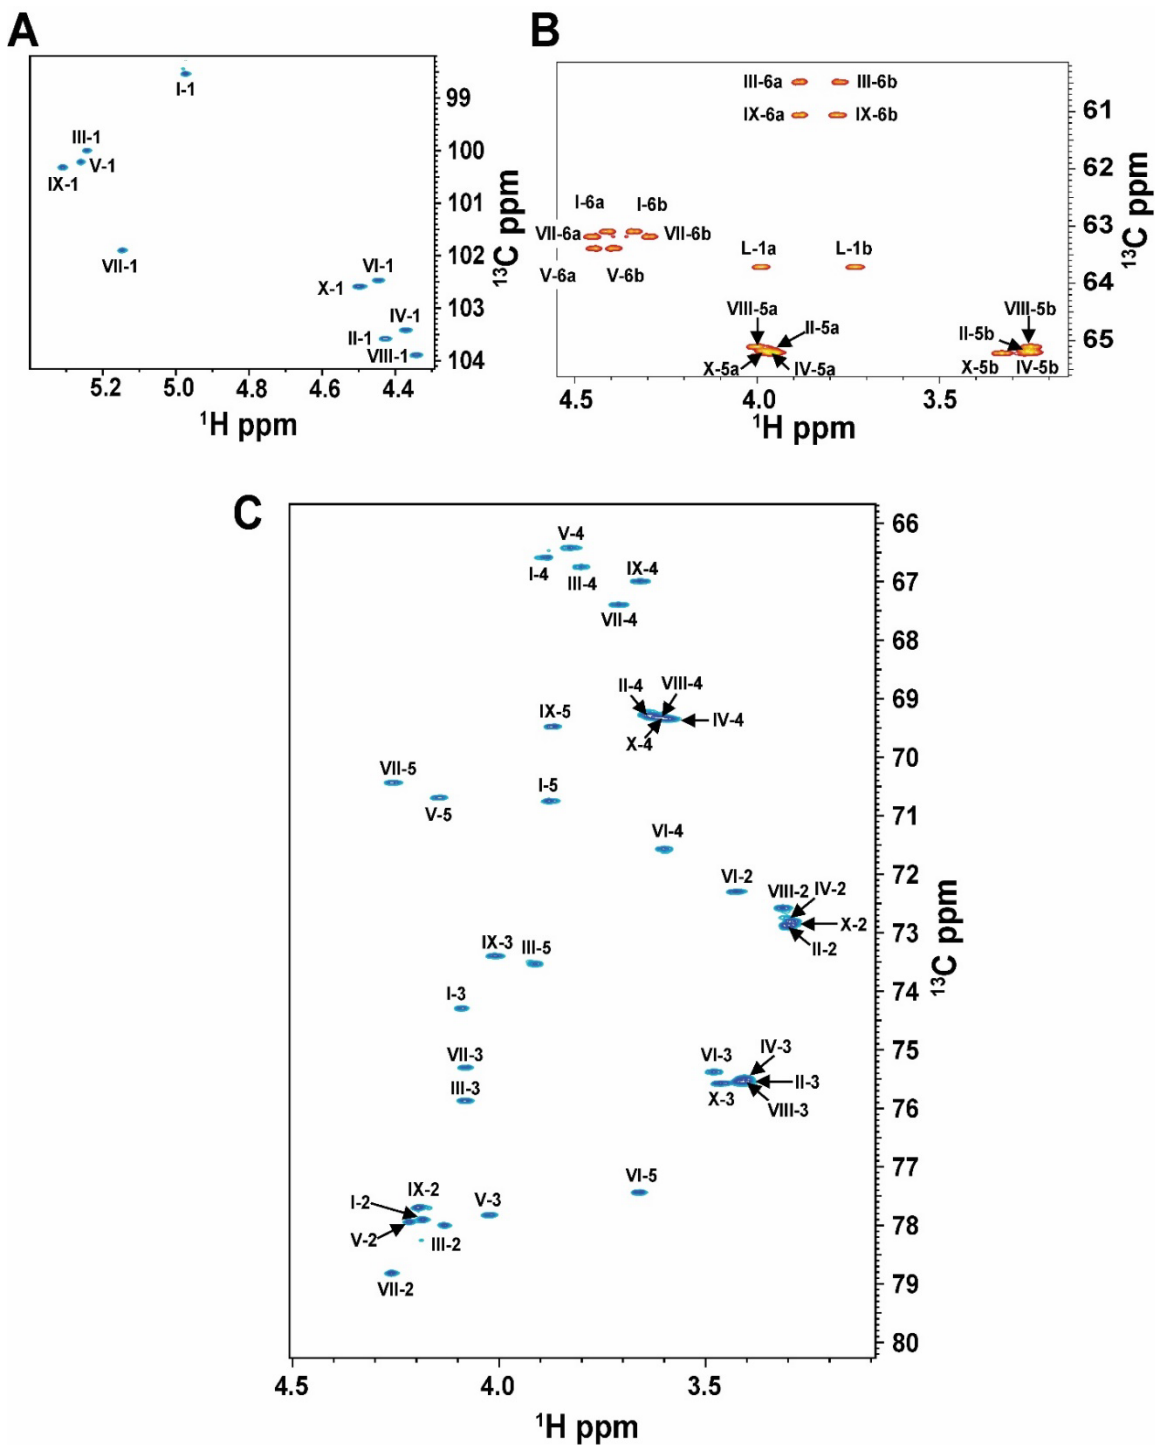

**Figure S1: GXM GXM10-Ac<sub>3</sub> <sup>1</sup>H-<sup>13</sup>C eHSQC.** (A) GXM10-Ac<sub>3</sub> Anomeric (<sup>1</sup>H, <sup>13</sup>C) region have a unique chemical shift (<sup>1</sup>H: 4.3 – 5.4 ppm; <sup>13</sup>C: 98-104 ppm) dispersed from other ring <sup>1</sup>Hs and <sup>13</sup>Cs. (B) In the eHSQC experiment, CH<sub>2</sub> resonances are negative, and O-acetylated Man C6s (Man[I,V,VII]) are de-shielded from the Man C6s without O-acetylation (Man[II, IX]) (C) NMR signals for Xyl rings are heavily overlapped, particularly for H2C2, H3C3, H4C4, and H5C5.

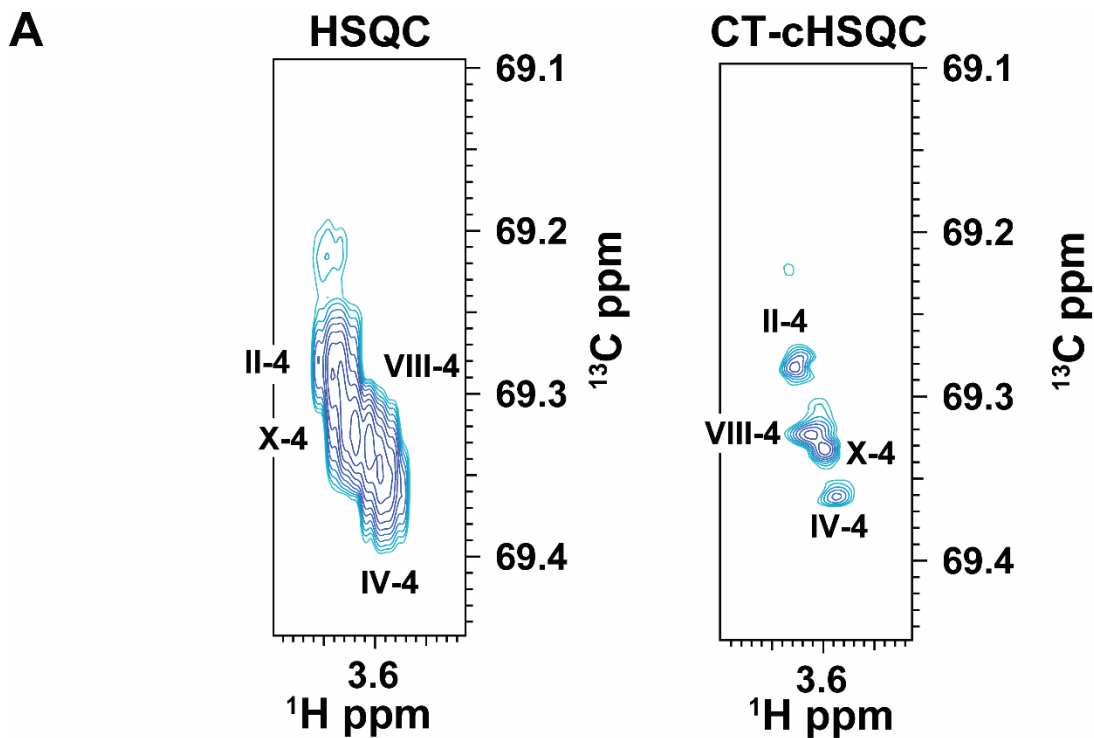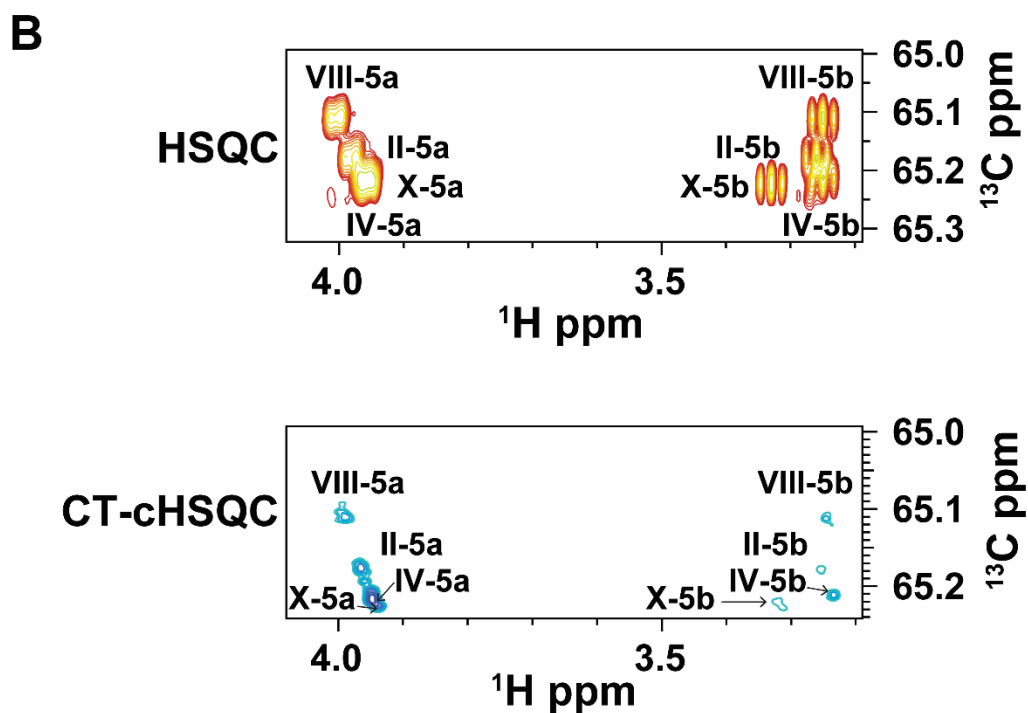

Figure S2: Overlapping H4C4 (A) and H5C5 (B) Xylose resonances in the  $^1\text{H}$ - $^{13}\text{C}$  HSQC experiment are resolved in a  $^1\text{H}$ - $^{13}\text{C}$  CT-cHSQC experiment.

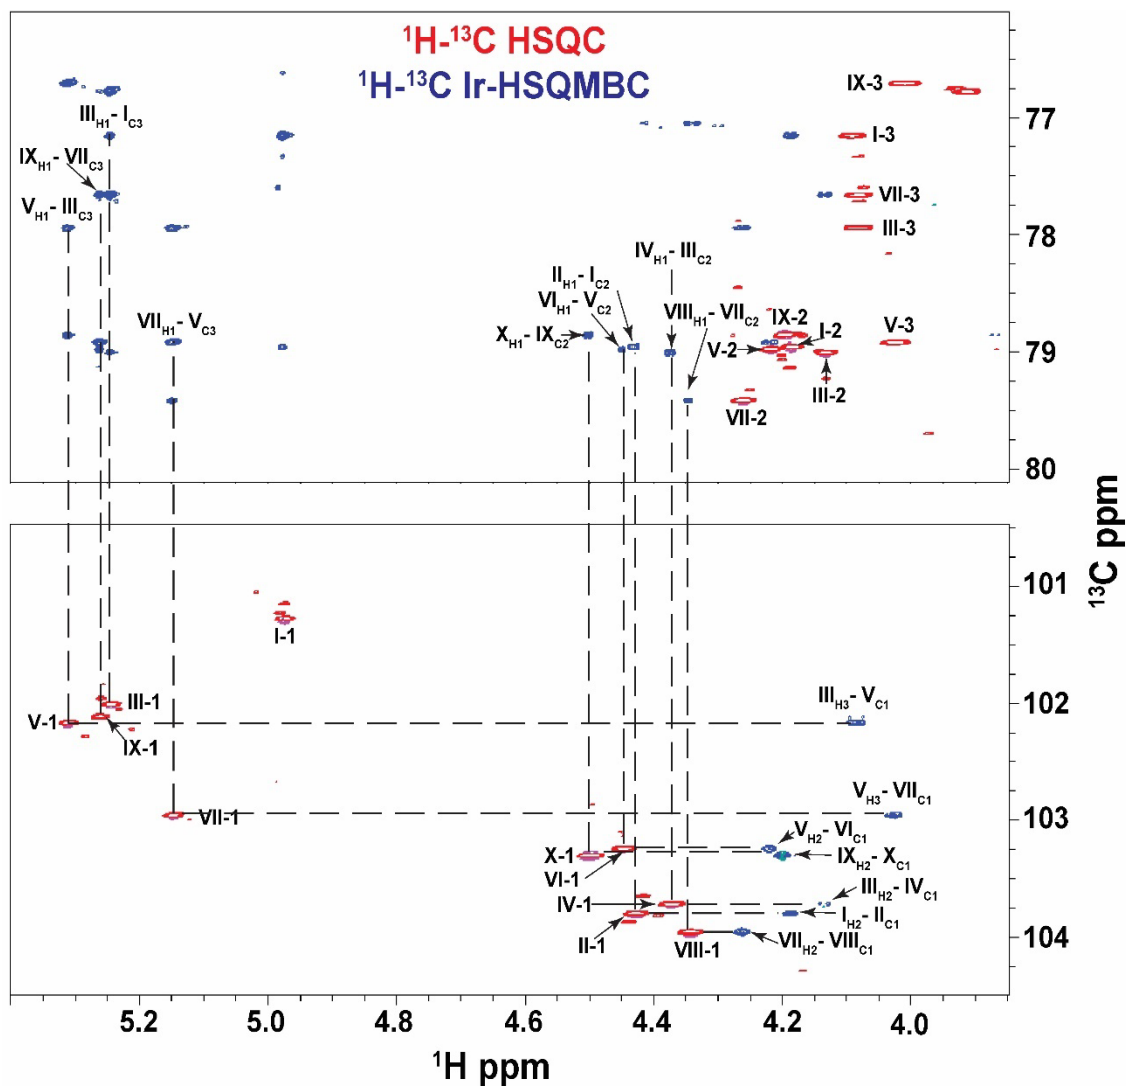

Figure S3: GXM10-Ac<sub>3</sub> inter-residue linkages were assigned from inter-glycan crosspeaks obtained in a  $^1\text{H}$ - $^{13}\text{C}$  LR-HSQMBC experiment (blue).  $^1\text{H}$ - $^{13}\text{C}$  HSQC spectrum is overlaid in red.

**Table S1: GXM Synthetic Decasaccharide <sup>1</sup>H-<sup>13</sup>C Chemical Shift Assignments**

|                 |                   | I      | II     | III    | IV     | V      | VI     | VII    | VIII   | IX     | X      |
|-----------------|-------------------|--------|--------|--------|--------|--------|--------|--------|--------|--------|--------|
| <sup>1</sup> H  | H-1               | 4.97   | 4.43   | 5.24   | 4.37   | 5.26   | 4.45   | 5.15   | 4.34   | 5.31   | 4.50   |
|                 | H-2               | 4.19   | 3.31   | 4.13   | 3.29   | 4.22   | 3.43   | 4.26   | 3.32   | 4.20   | 3.30   |
|                 | H-3               | 4.09   | 3.42   | 4.08   | 3.41   | 4.03   | 3.48   | 4.08   | 3.41   | 4.01   | 3.47   |
|                 | H-4               | 3.89   | 3.69   | 3.80   | 3.60   | 3.83   | 3.60   | 3.71   | 3.64   | 3.66   | 3.63   |
|                 | H-5ax             | 3.88   | 3.27   | 3.91   | 3.26   | 4.15   | 3.66   | 4.26   | 3.25   | 3.87   | 3.33   |
|                 | H-5eq             | -      | 3.99   | -      | 3.97   | -      | -      | -      | 4.00   | -      | 3.96   |
|                 | H-6a              | 4.41   | -      | 3.89   | -      | 4.45   | -      | 4.45   | -      | 3.89   | -      |
|                 | H-6b              | 4.34   | -      | 3.77   | -      | 4.39   | -      | 4.30   | -      | 3.78   | -      |
|                 | H-CH <sub>3</sub> | 2.14   | -      | -      | -      | 2.20   | -      | 2.17   | -      | -      | -      |
| <sup>13</sup> C | C-1               | 98.54  | 103.58 | 100.00 | 103.58 | 100.22 | 102.48 | 101.90 | 103.89 | 100.32 | 102.59 |
|                 | C-2               | 77.91  | 72.89  | 78.00  | 72.89  | 77.94  | 72.30  | 78.82  | 72.58  | 77.70  | 72.87  |
|                 | C-3               | 74.29  | 75.53  | 75.31  | 75.53  | 77.83  | 75.38  | 75.87  | 75.55  | 73.40  | 75.57  |
|                 | C-4               | 66.59  | 69.36  | 66.75  | 69.36  | 66.42  | 71.57  | 67.40  | 69.28  | 67.00  | 69.32  |
|                 | C-5               | 70.75  | 65.19  | 73.53  | 65.19  | 70.69  | 77.44  | 70.44  | 65.11  | 69.48  | 65.22  |
|                 | C-6               | 63.10  | -      | 60.49  | -      | 65.39  | -      | 63.19  | -      | 61.06  | -      |
|                 | C-CO              | 174.08 | -      | -      | -      | 174.16 | -      | 174.12 | -      | -      | -      |
|                 | C-CH <sub>3</sub> | 20.24  | -      | -      | -      | 20.58  | -      | 20.57  | -      | -      | -      |

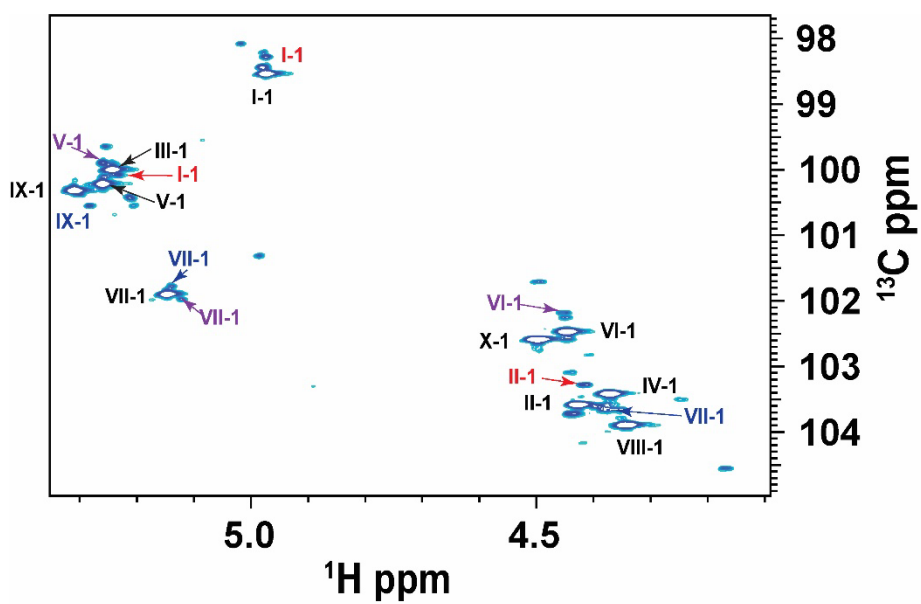

**Figure S4:  $^1\text{H}$ - $^{13}\text{C}$  HSQC Anomeric Region showing de-O-Acetylated Decasaccharide Resonances.** The black labels designate GXM10-Ac3 anomeric signals. The loss of O-acetylation at I-Man-C6, V-Man-C6, and VII-Man-C6 are labeled in red, purple, and blue, respectively.

**Table S2 <sup>1</sup>H-<sup>13</sup>C Chemical Shift Assignments for de-O-Acetylated GXM Decasaccharide**

|                 |                   | I      | II     | III    | IV     | V      | VI      | VII             | VIII   | IX       | X      |
|-----------------|-------------------|--------|--------|--------|--------|--------|---------|-----------------|--------|----------|--------|
| <sup>1</sup> H  | H-1               | 4.97   | 4.42   | 5.23   | 4.37   | 5.26*  | 4.45*   | 5.12*(5.14)     | 4.34   | (5.28)   | 4.50   |
|                 | H-2               | 4.17   | 3.31   | 4.13   | 3.29   | 4.22   | 3.43    | 4.26            | 3.32   | 4.20     | 3.30   |
|                 | H-3               | 4.08   | 3.42   | 4.08   | 3.41   | 4.03   | 3.48    | 4.08            | 3.41   | 4.01     | 3.47   |
|                 | H-4               | 3.85   | 3.69   | 3.80   | 3.60   | 3.83   | 3.60    | 3.71            | 3.64   | 3.66     | 3.63   |
|                 | H-5ax             | 3.88   | 3.27   | 3.91   | 3.26   | 4.15   | 3.66    | 4.26            | 3.25   | 3.87     | 3.33   |
|                 | H-5eq             | -      | 3.99   | -      | 3.97   | -      | -       | -               | 4.00   | -        | 3.96   |
|                 | H-6a              | 4.41   | -      | 3.89   | -      | 4.45   | -       | 4.45            | -      | 3.89     | -      |
|                 | H-6b              | 4.34   | -      | 3.77   | -      | 4.39   | -       | 4.30            | -      | 3.78     | -      |
|                 | H-CH <sub>3</sub> | 2.14   | -      | -      | -      | 2.20   | -       | 2.17            | -      | -        | -      |
| <sup>13</sup> C | C-1               | 98.28  | 103.28 | 100.08 | 103.58 | 99.65* | 102.18* | 101.98*(101.78) | 103.89 | (100.55) | 102.59 |
|                 | C-2               | 77.72  | 72.89  | 78.00  | 72.89  | 77.94  | 72.30   | 78.82           | 72.58  | 77.70    | 72.87  |
|                 | C-3               | 74.65  | 75.53  | 75.41  | 75.53  | 77.83  | 75.38   | 75.87           | 75.55  | 73.40    | 75.57  |
|                 | C-4               | 66.59  | 69.36  | 66.75  | 69.36  | 66.42  | 71.57   | 67.40           | 69.28  | 67.00    | 69.32  |
|                 | C-5               | 73.23  | 65.19  | 73.50  | 65.19  | 70.69  | 77.44   | 70.44           | 65.11  | 69.48    | 65.22  |
|                 | C-6               | 63.10  | -      | 60.49  | -      | 65.39  | -       | 63.19           | -      | 61.06    | -      |
|                 | C-CO              | 174.08 | -      | -      | -      | 174.16 | -       | 174.12          | -      | -        | -      |
|                 | C-CH <sub>3</sub> | -      | -      | -      | -      | -      | -       | -               | -      | -        | -      |

Italic denotes chemical shift from the loss of I-Man-C6 O-Acetylation, \* denotes the chemical shift from the loss of V-Man-C6 O-Acetylation, and () denotes loss of VII-Man-C6 O-Acetylation.

**Table S3. Measured transglycosidic  $^3J_{CH}$  values** from  $^1H$ - $^{13}C$  PIP-HSQMBC NMR experiment. All  $^3J_{CH}$  have an error of 0.5 Hz.  $\phi$  and  $\psi$  torsions were calculated using two different parameterized Karplus relations (see methods). Gold color denotes torsions similar to the average torsions obtained from the MD trajectory.

| Tglyc. Bond            |        | $^3J_{CH}$<br>Exp<br>(Hz) | Calc. Torsion from $J_{meas}$ . |                 |                |                |                      |                       |
|------------------------|--------|---------------------------|---------------------------------|-----------------|----------------|----------------|----------------------|-----------------------|
|                        |        |                           | Tor-S19                         |                 |                | Tor-RW         |                      |                       |
| Man[I]-<br>Man[III]    | $\phi$ | 2.5                       | -123<br>(+/- 7)                 | -55<br>(+/- 8)  | 40<br>(+/- 8)  | 110<br>(+/- 7) | $\pm 51$<br>(+/- 12) | $\pm 124$<br>(+/- 11) |
|                        | $\psi$ | --                        | --                              | --              | --             | --             | --                   | --                    |
| Man[III]-<br>Man[V]    | $\phi$ | 3.0                       | -126<br>(+/- 7)                 | -51<br>(+/- 8)  | 37<br>(+/- 8)  | 113<br>(+/- 6) | $\pm 47$<br>(+/- 11) | $\pm 127$<br>(+/- 10) |
|                        | $\psi$ | --                        | --                              | --              | --             | --             | --                   | --                    |
| Man[V]-<br>Man[VII]    | $\phi$ | 3.5                       | -130<br>(+/- 6)                 | -46<br>(+/- 8)  | 32<br>(+/- 6)  | 116<br>(+/- 6) | $\pm 42$<br>(+/- 11) | $\pm 131$<br>(+/- 10) |
|                        | $\psi$ | 3.4                       | -129<br>(+/- 6)                 | -47<br>(+/- 8)  | 33<br>(+/- 8)  | 116<br>(+/- 6) | $\pm 43$<br>(+/- 11) | $\pm 131$<br>(+/- 10) |
| Man[VII]-<br>Man[IX]   | $\phi$ | 2.9                       | -126<br>(+/- 7)                 | -52<br>(+/- 8)  | 38<br>(+/- 8)  | 112<br>(+/- 7) | $\pm 48$<br>(+/- 11) | $\pm 126$<br>(+/- 10) |
|                        | $\psi$ | 4.1                       | -134<br>(+/- 6)                 | -40<br>(+/- 9)  | 26<br>(+/- 9)  | 121<br>(+/- 6) | $\pm 36$<br>(+/- 12) | $\pm 136$<br>(+/- 10) |
| Man[I]-<br>Xyl[II]     | $\phi$ | 3.8                       | -132<br>(+/- 6)                 | -44<br>(+/- 8)  | 29<br>(+/- 8)  | 118<br>(+/- 6) | $\pm 40$<br>(+/- 11) | $\pm 134$<br>(+/- 10) |
|                        | $\psi$ | 5.5                       | -143<br>(+/- 6)                 | -25<br>(+/- 14) | 11<br>(+/- 14) | 130<br>(+/- 6) | $\pm 22$<br>(+/- 17) | $\pm 148$<br>(+/- 11) |
| Man[III]-<br>Xyl[IV]   | $\phi$ | 4.0                       | -134<br>(+/- 6)                 | -41<br>(+/- 9)  | 27<br>(+/- 9)  | 121<br>(+/- 6) | $\pm 37$<br>(+/- 12) | $\pm 136$<br>(+/- 10) |
|                        | $\psi$ | 5.2                       | -142<br>(+/- 6)                 | -28<br>(+/- 16) | 14<br>(+/- 16) | 128<br>(+/- 6) | $\pm 25$<br>(+/- 19) | $\pm 146$<br>(+/- 11) |
| Man[V]-<br>GlcA[VI]    | $\phi$ | 4.1                       | -134<br>(+/- 6)                 | -41<br>(+/- 9)  | 27<br>(+/- 9)  | 121<br>(+/- 6) | $\pm 37$<br>(+/- 12) | $\pm 136$<br>(+/- 10) |
|                        | $\psi$ | 4.9                       | -139<br>(+/- 6)                 | -33<br>(+/- 11) | 19<br>(+/- 11) | 126<br>(+/- 6) | $\pm 29$<br>(+/- 14) | $\pm 143$<br>(+/- 5)  |
| Man[VII]-<br>Xyl[VIII] | $\phi$ | 4.2                       | -135<br>(+/- 6)                 | -40<br>(+/- 9)  | 25<br>(+/- 9)  | 121<br>(+/- 6) | $\pm 36$<br>(+/- 12) | $\pm 137$<br>(+/- 10) |
|                        | $\psi$ | 4.8                       | -139<br>(+/- 6)                 | -34<br>(+/- 10) | 20<br>(+/- 10) | 125<br>(+/- 6) | $\pm 30$<br>(+/- 13) | $\pm 142$<br>(+/- 10) |
| Man[IX]-<br>Xyl[X]     | $\phi$ | 3.5                       | -130<br>(+/- 6)                 | -46<br>(+/- 8)  | 32<br>(+/- 8)  | 117<br>(+/- 6) | $\pm 42$<br>(+/- 11) | $\pm 131$<br>(+/- 10) |
|                        | $\psi$ | 4.8                       | -140<br>(+/- 6)                 | -33<br>(+/- 10) | 19<br>(+/- 10) | 125<br>(+/- 6) | $\pm 29$<br>(+/- 14) | $\pm 142$<br>(+/- 10) |



**Table S4. Average  $\phi$  and  $\psi$  torsions from MD trajectory and predicted  $^3J_{CH}$  values. Gray denotes calculated  $^3J_{CH}$  values that do not agree well with experimental torsions.**

| Tglyc. Bond            |        | MD Tor.                | $^3J_{CH}$             |                        |
|------------------------|--------|------------------------|------------------------|------------------------|
|                        |        |                        | Calc. from MD          |                        |
|                        |        |                        | <i>J</i> -S19          | <i>J</i> -RW           |
| Man[I]-<br>Man[III]    | $\phi$ | <b>-53</b><br>(+/- 12) | <b>2.7</b><br>(+/-1.1) | <b>2.0</b><br>(+/-1.0) |
|                        | $\psi$ | <b>-8</b><br>(+/- 21)  | <i>5.3</i><br>(+/-0.9) | <i>4.3</i><br>(+/-1.0) |
| Man[III]-<br>Man[V]    | $\phi$ | <b>-51</b><br>(+/- 14) | <b>2.9</b><br>(+/-1.1) | <b>2.2</b><br>(+/-1.0) |
|                        | $\psi$ | <b>-5</b><br>(+/- 22)  | <i>5.3</i><br>(+/-1.0) | <i>4.3</i><br>(+/-1.0) |
| Man[V]-<br>Man[VII]    | $\phi$ | <b>-45</b><br>(+/- 15) | <b>3.4</b><br>(+/-1.1) | <b>2.6</b><br>(+/-1.0) |
|                        | $\psi$ | <b>5</b><br>(+/- 24)   | <i>4.9</i><br>(+/-1.3) | <i>4.2</i><br>(+/-1.1) |
| Man[VII]-<br>Man[IX]   | $\phi$ | <b>-47</b><br>(+/- 14) | <b>3.3</b><br>(+/-1.1) | <b>2.5</b><br>(+/-1.0) |
|                        | $\psi$ | <b>6</b><br>(+/- 22)   | <i>5.0</i><br>(+/-1.2) | <i>4.3</i><br>(+/-1.0) |
| Man[I]-<br>Xyl[II]     | $\phi$ | <b>41</b><br>(+/- 20)  | <b>2.4</b><br>(+/-1.5) | <b>2.8</b><br>(+/-1.3) |
|                        | $\psi$ | <b>14</b><br>(+/- 25)  | <b>4.7</b><br>(+/-1.7) | <b>4.0</b><br>(+/-1.3) |
| Man[III]-<br>Xyl[IV]   | $\phi$ | <b>41</b><br>(+/- 31)  | <b>2.6</b><br>(+/-1.8) | <b>2.9</b><br>(+/-1.3) |
|                        | $\psi$ | <b>17</b><br>(+/- 26)  | <b>4.3</b><br>(+/-1.8) | <b>3.8</b><br>(+/-1.4) |
| Man[V]-<br>GlcA[VI]    | $\phi$ | <b>39</b><br>(+/- 30)  | <b>2.7</b><br>(+/-1.9) | <b>3.0</b><br>(+/-1.4) |
|                        | $\psi$ | <b>32</b><br>(+/- 33)  | <b>2.9</b><br>(+/-1.9) | <b>2.8</b><br>(+/-1.5) |
| Man[VII]-<br>Xyl[VIII] | $\phi$ | <b>40</b><br>(+/- 23)  | <b>2.6</b><br>(+/-1.6) | <b>3.0</b><br>(+/-1.3) |
|                        | $\psi$ | <b>30</b><br>(+/- 27)  | <b>3.4</b><br>(+/-2.0) | <b>3.2</b><br>(+/-1.5) |
| Man[IX]-<br>Xyl[X]     | $\phi$ | <b>40</b><br>(+/- 22)  | <b>2.4</b><br>(+/-1.4) | <b>2.8</b><br>(+/-1.2) |
|                        | $\psi$ | <b>20</b><br>(+/- 30)  | <b>4.0</b><br>(+/-1.8) | <b>3.5</b><br>(+/-1.3) |

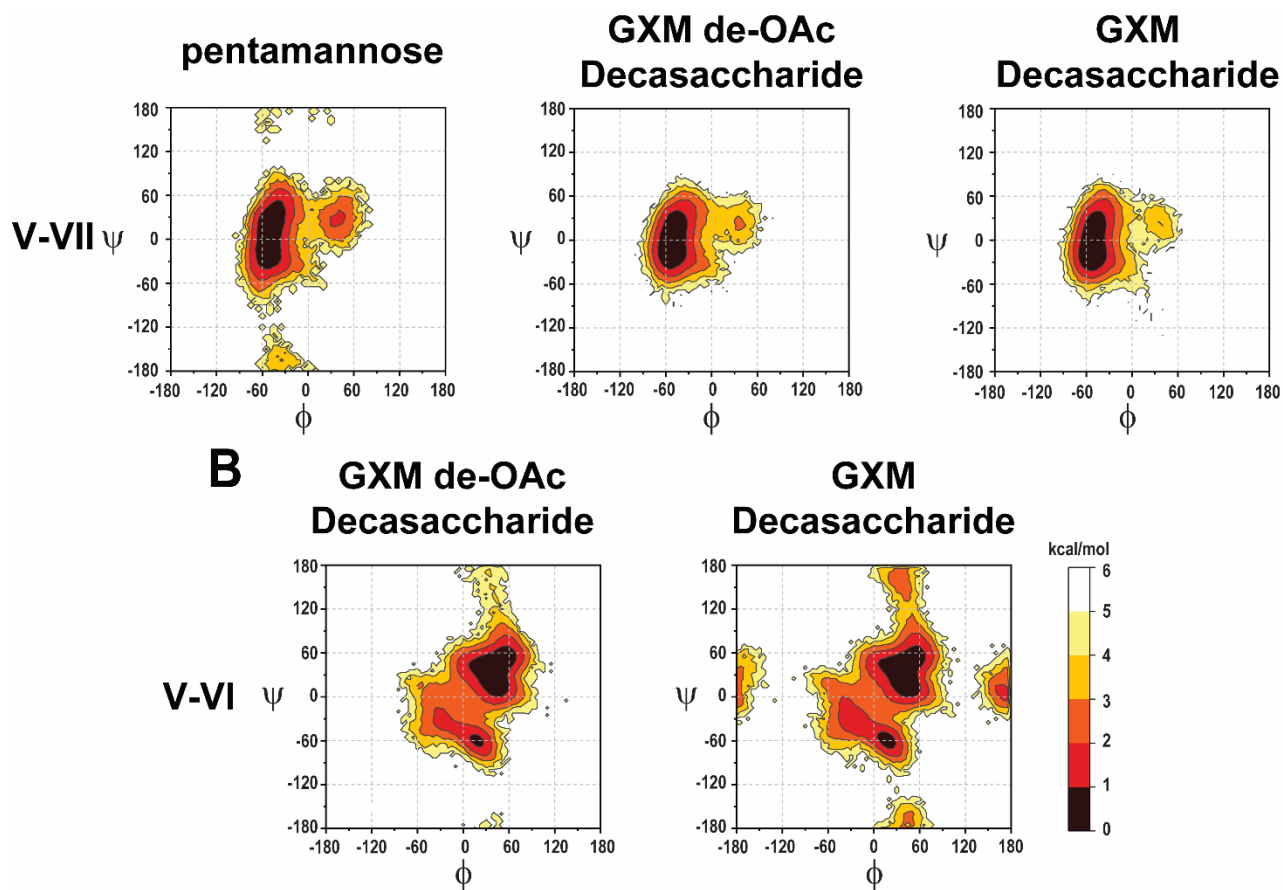

**Figure S5: Effect of Substitution on GXM10-Ac<sub>3</sub> Structure.** A ( $\phi$ ,  $\psi$ ) transglycosidic torsion angle population analysis of a pentamannose, GXM10, and GXM10-Ac<sub>3</sub> were compared. **(A)** The Man[V]-Man[VII] transglycosidic torsion heatmap suggests a decrease in flexibility upon substitution of Xyl and O-acetylation. **(B)** O-acetylation does not seem to have an effect on the torsional landscape of the Man-Xyl/GlcA linkages.

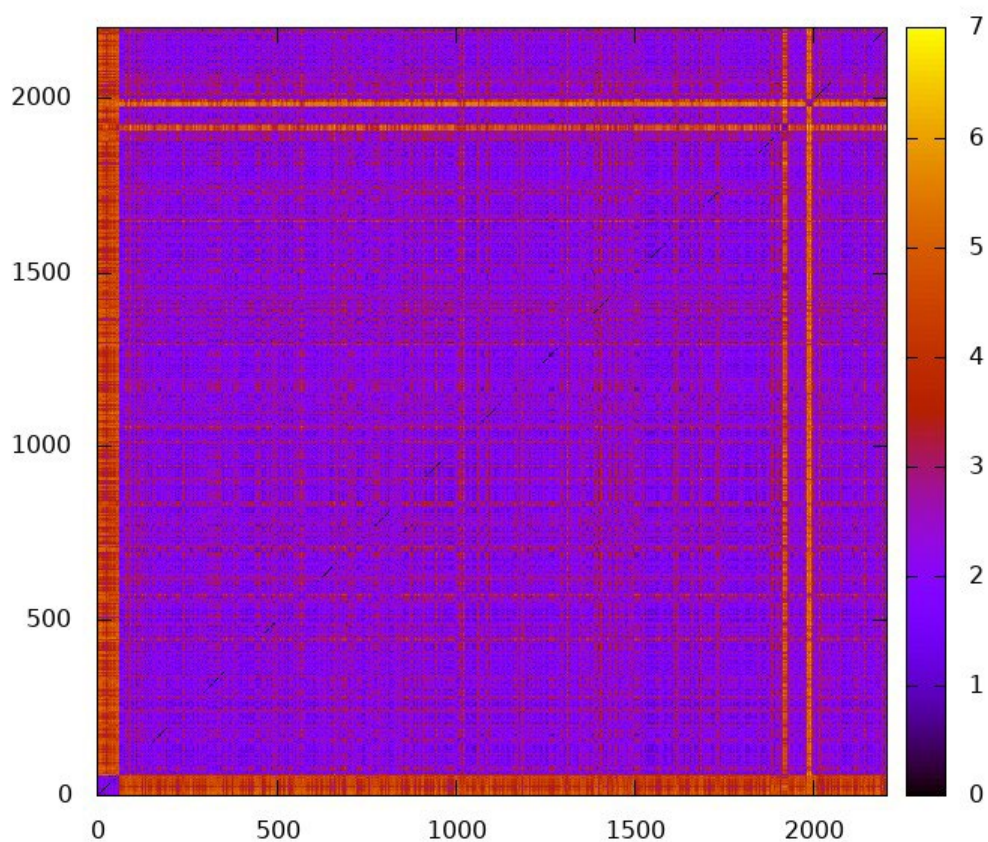

**Figure S6.** 2D-RMSD map of GXM10-Ac<sub>3</sub>, analyzing 2200 frames over 2.2  $\mu$ s MD. RMSD calculated using the 6-ring atoms for all 10 glycan residues in GXM10-Ac<sub>3</sub> (total of 60 atoms). The first 75 ns correspond to a high energy conformation that is not revisited once a steady state is reached. Based on this, analysis of the GXM10-Ac<sub>3</sub> MD was limited the resulting trajectory starting at 100 ns up to 2100 ns (2  $\mu$ s in total)

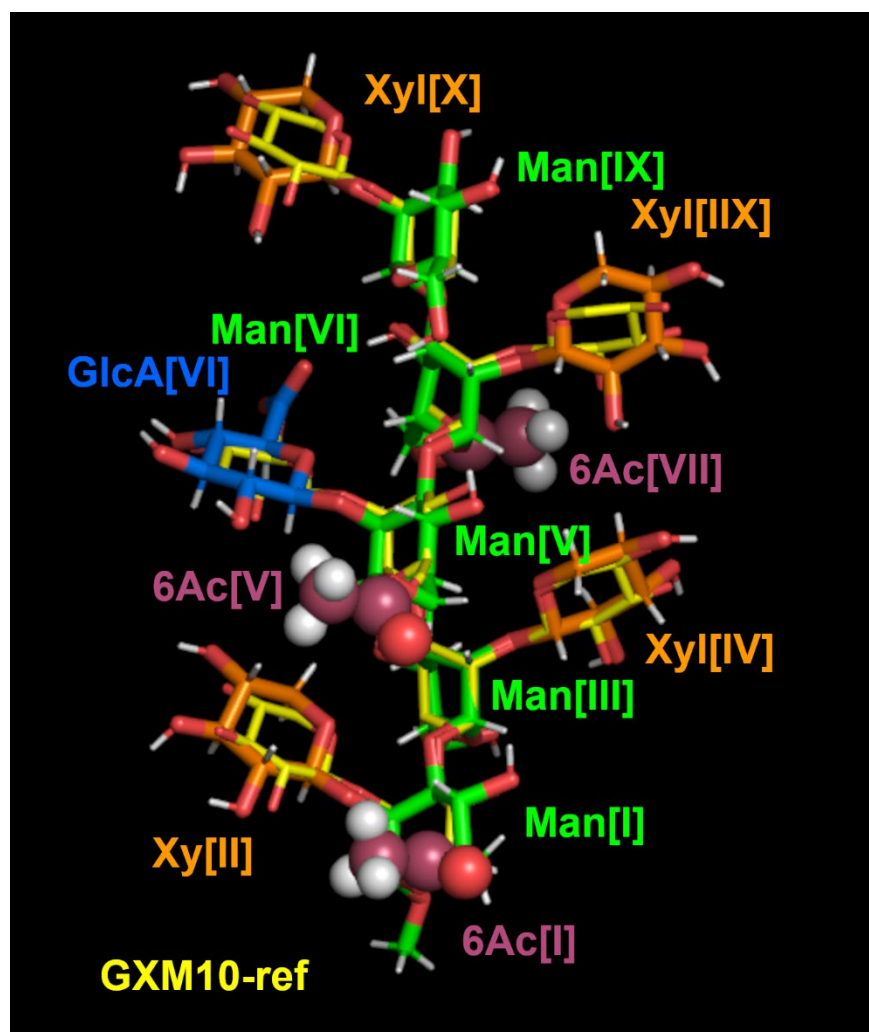

**Figure S7.** Overlay of GXM10ref (yellow) and the GXM10-Ac<sub>3</sub> model with lowest RMSD to GXM10ref (RMSD = 0.56 Å, 60 ring atoms) from the 2 μs MD trajectory.

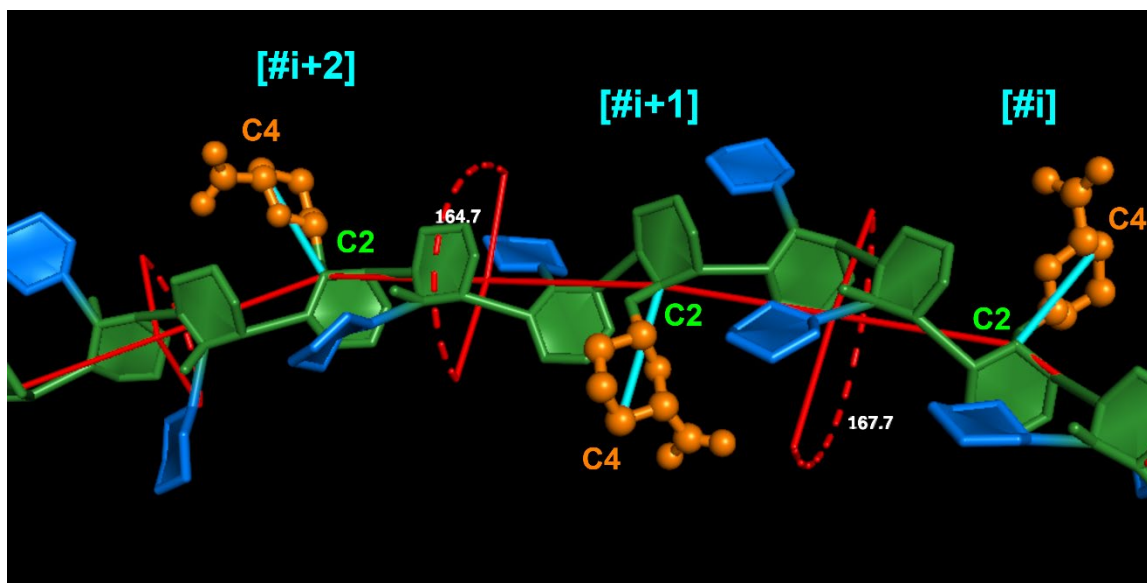

**Figure S8. Vector definitions to calculate the twist pitch of the GXM PS.** Vectors between atoms Man{GlcA}-C2 and GlcA-C4 were defined for each repeating unit (RU) [cyan lines], then dihedral angles between consecutive vectors were calculated throughout the trajectory. The figure shows a portion of the final frame of GXM12RU to illustrate the general procedure employed to determine inter-RU's dihedrals to generate Figure 4C.

**Movie S1.** GXM10-ref shown in Figure 3A rolled around the  $y$ -axis to better appreciate its 3D structure.

**Movie S2.** The trajectory of the linked Man[V]6Ac-GlcA shown in Figure 3B, to better illustrate the branch dynamics. The trajectory was 'smoothed' to reduce high frequency movements.

**Movie S3.** Last 500 ns of the MD trajectory of GXM12RU. Frames were RMSD minimized to the ring atoms of the colored residues. The trajectory was 'smoothed' to reduce high frequency movements.
